1 **Identification of a core module for bone mineral density through the**  
2 **integration of a co-expression network and GWAS data**

3  
4 Olivia L Sabik<sup>1,2</sup>, Gina M Calabrese<sup>1</sup>, Eric Taleghani<sup>1</sup>, Cheryl L Ackert-Bicknell<sup>3</sup>, Charles R  
5 Farber\*<sup>1,4</sup>

6  
7 <sup>1</sup>Center for Public Health Genomics, School of Medicine, University of Virginia, Charlottesville,  
8 VA 22908

9 <sup>2</sup>Department of Biochemistry and Molecular Genetics, School of Medicine, University of Virginia,  
10 Charlottesville, VA 22908

11 <sup>3</sup>Center for Musculoskeletal Research, University of Rochester Medical Center, University of  
12 Rochester, Rochester, NY 14624

13 <sup>4</sup>Department of Public Health Sciences, University of Virginia, Charlottesville, VA 22908

14  
15  
16 *Correspondence to:* **Charles R. Farber**

17 *E-mail:* **crf2s@virginia.edu**

18 Center for Public Health Genomics

19 University of Virginia

20 P.O. Box 800717

21 Charlottesville, VA 22908, USA

22 Tel. 434-243-8584

23  
24 Present Address for Dr. Cheryl Ackert-Bicknell:

25 Department of Orthopedics

26 University of Colorado Hospital

27 Aurora, CO, USA

28

29

30

31

32

33

34

35

36

37

38

39

40

41

42

43

44

45 **Abstract**

46 Recently, the “omnigenic” model of the genetic architecture of complex traits proposed two  
47 general categories of causal genes, core and peripheral. Core genes are hypothesized to play a  
48 direct role in regulating disease; thus, their identification has the potential to reveal critical  
49 regulators and novel therapeutic targets. Here, we sought to identify genes with “core-like”  
50 characteristics for bone mineral density (BMD), one of the most significant predictors of  
51 osteoporotic fracture. This was accomplished by analyzing genome-wide association study  
52 (GWAS) data through the lens of a cell-type and timepoint-specific gene co-expression network  
53 for mineralizing osteoblasts. We identified a single co-expression network module that was  
54 enriched for genes implicated by GWAS and partitioned BMD heritability, correlated with *in vitro*  
55 osteoblast mineralization, and enriched for genes, which when mutated in humans or mice, led  
56 to a skeletal phenotype. Further characterization of this module identified four novel genes  
57 (*B4GALNT3*, *CADM1*, *DOCK9*, and *GPR133*) located within BMD GWAS loci with colocalizing  
58 expression quantitative trait loci (eQTL) and altered BMD in mouse knockouts, suggesting they  
59 are causal genetic drivers of BMD in humans. Our network-based approach identified a “core”  
60 module for BMD and provides a resource for expanding our understanding of the genetics of  
61 bone mass.

62

63

64

65

66

67

68

69

70

71 **Introduction:**

72 Osteoporosis is a disease characterized by low bone mineral density (BMD) and an increased  
73 risk of fracture <sup>1</sup>. Worldwide, it is one of the most common diseases, affecting over 200 million  
74 individuals and causing 8.9 million fractures annually <sup>2</sup>. Although osteoporosis is a multifactorial  
75 disease influenced by both environmental and genetic variation, fracture-related traits, such as  
76 BMD, are influenced, in large part, by genetics ( $h^2 > 0.5$ ) <sup>3-5</sup>. Over the last decade large-scale  
77 genome wide association studies (GWASs) have begun to dissect the genetics basis of bone  
78 traits with a primary focus on BMD <sup>6,7</sup>. These studies have been tremendously successful,  
79 identifying over 1100 independent BMD associations <sup>8-10</sup>. However, despite the wealth of  
80 genetic signals, the genes and mechanisms through which these associations impact bone  
81 remain largely unknown <sup>6,7</sup>.

82         Recently, the “omnigenic model” was proposed as a framework for understanding the  
83 genetic architecture of complex traits, such as BMD <sup>11,12</sup>. The model posits that all genes  
84 expressed in disease-relevant cell-types have the potential to contribute to disease variation.  
85 One of the key concepts of the omnigenic model is the classification of causal genes as either  
86 “core” or “peripheral”. Core genes are predicted to directly modulate traits; whereas, peripheral  
87 genes are expected to impact traits via their effects on networks of core genes <sup>12</sup>. The  
88 distinction between core and peripheral genes is logical given the evidence demonstrating that  
89 the contributions of genes to a disease or phenotype are not equal. As an example, *RUNX2* is a  
90 transcription factor and master regulator of osteoblast activity and bone formation that initiates a  
91 transcriptional program absolutely required for the formation of a mineralized skeleton <sup>13</sup>. In  
92 contrast, hundreds of genes have been identified participating in myriad pathways whose  
93 absence has subtle, often context-dependent (such as age and sex), effects on bone <sup>8,9,14</sup>.  
94 Furthermore, we know the same distinction lies in biological processes, some of which play an  
95 intimate role in the regulation of a trait, while others play minor accessory roles. Thus, the  
96 identification of causal genes from GWAS data and the labeling of such genes as core or

97 peripheral has the potential to highlight previously undiscovered key regulatory genes for  
98 specific trait-related biological processes, which may be more ideal therapeutic targets.

99         There are two main challenges in the identification of core genes. The first is how to  
100 precisely define them <sup>12,15–17</sup>. In the omnigenic model, a gene is defined as a “core” gene “if and  
101 only if the gene product (protein, or RNA for a noncoding gene) has a direct effect—not  
102 mediated through regulation of another gene—on cellular and organismal processes leading to  
103 a change in the expected value of a particular phenotype” <sup>11,12</sup>. This statistical definition is  
104 convenient for explaining the omnigenic model, but is difficult to utilize for the identification of  
105 core genes in practice. It is also very strict; e.g. is *RUNX2*, as described above, a core gene for  
106 BMD? Instead we propose to use a set of biologically motivated criteria to distinguish genes  
107 with core-like properties from those that are likely peripheral by leveraging known pathways and  
108 processes that are essential to a disease-associated trait. For example, we would expect the  
109 expression of genes with core-like properties operating in pathways of critical importance in the  
110 regulation of BMD to be correlated with BMD and their severe perturbation to have a substantial  
111 impact on BMD (e.g., monogenic disease genes).

112         The second challenge is designing a strategy to identify genes with core-like properties,  
113 since GWAS alone is incapable of determining whether a locus is driven by a core or peripheral  
114 gene. One of the primary tenets of the omnigenic model is that peripheral genes account for a  
115 substantial component of the heritability of a trait because their effects are amplified by  
116 interactions with networks of co-expressed core genes <sup>12</sup>. If one expects core genes to be co-  
117 expressed then integrating the results of GWAS with co-expression networks, which reflect the  
118 transcriptional programs associated with the trait of interest, is a logical approach to identify  
119 modules of genes with core-like properties. A number of studies have already successfully used  
120 co-expression networks to inform GWAS, however this approach has not been used in the  
121 context of the omnigenic model <sup>18–22</sup>.

122         Here, we combine weighted gene co-expression network analysis (WGCNA) and BMD

123 GWAS data to identify genes that are causal genetic drivers of BMD with core-like properties.  
124 Our approach used a co-expression network for mature, mineralizing osteoblasts which we  
125 hypothesized would allow us to identify core genes specific for the process of mineralization.  
126 We first identified network modules enriched for genes implicated by GWAS and partitioned  
127 BMD heritability and then used the following biologically motivated filters to identify modules  
128 enriched for genes with core-like properties (i.e. “core” modules): (1) correlation with *in vitro*  
129 mineralization (a process of fundamental importance to BMD), (2) enrichment for genes that,  
130 when knocked-out in mice, alter BMD, and (3) enrichment for monogenic skeletal disease  
131 genes. Our analysis identified a single module (referred to as the “purple” module) fulfilling all  
132 the proposed criteria of a core module. As would be expected of a core module for  
133 mineralization, the purple module was enriched for genes with well-known roles in osteoblast  
134 activity and bone formation. Furthermore, we identified two submodules of genes within the  
135 purple module that followed distinct patterns of expression across osteoblast differentiation, the  
136 early and the late differentiation submodule (EDS and LDS). We found that the LDS, relative to  
137 the EDS, was more enriched for genes with core-like properties. Supporting the hypothesis that  
138 many LDS genes are causal genetic drivers, we observed that lead BMD SNPs located in  
139 GWAS loci harboring an LDS gene were more likely to overlap active regulatory elements in  
140 osteoblasts. Further characterization of the LDS identified four novel genes (*B4GALNT3*,  
141 *CADM1*, *DOCK9*, and *GPR133*) located within BMD GWAS loci that had colocalizing human  
142 eQTL and altered BMD in mouse knockout studies. We anticipate that this integrative approach  
143 will aid in the search for genes with core-like properties and pathways underlying BMD and risk  
144 of fracture.

145

## 146 **Results**

### 147 **I. Construction of a co-expression network reflecting transcriptional programs in** 148 **mineralizing osteoblasts**

149           The goal of this work was to use a cell- and stage-specific co-expression network to  
150 identify genes with core-like properties that are causal for BMD GWAS associations. We chose  
151 to focus on generating a co-expression network using transcriptomic data from a single cell-type  
152 at a single-time point during differentiation: mature, mineralizing osteoblasts. We hypothesized  
153 this would allow us to focus on genes with core-like properties in the context of mineralization, a  
154 process critical in the regulation of BMD. We began by using WGCNA to construct a co-  
155 expression network using transcriptomic profiles generated from mineralizing primary calvarial  
156 osteoblasts from 42 strains of Collaborative Cross (CC) mice <sup>23</sup>. The CC is a panel of genetically  
157 diverse recombinant inbred strains. The resulting network consisted of 65 modules of genes,  
158 with an average of 292 genes per module (**Figure 1 and Supplemental File 1**). Each co-  
159 expression module was distinguished by its assigned color (e.g., the purple module).

160           To confirm that modules of genes produced by the co-expression analysis represented  
161 transcriptional programs reflecting specific biological processes, we assessed whether modules  
162 were enriched for genes associated with specific gene ontology (GO) terms <sup>24</sup>. Most network  
163 modules were enriched for general biological processes, such as the immune response ( $P_{\text{adj}} =$   
164  $6.6 \times 10^{-36}$ ) in the blue module, mRNA metabolism ( $P_{\text{adj}} = 7.8 \times 10^{-9}$ ) in the darkolivegreen  
165 module, and chromatin remodeling ( $P_{\text{adj}} = 1.9 \times 10^{-4}$ ) in the grey60 module (**Figure 1 and**  
166 **Supplemental File 2**). However, as would be expected, there were a subset of modules  
167 enriched for genes involved in the activity of osteoblasts. For example, the cyan module was  
168 enriched for members of the Wnt signaling pathway (a key regulator of osteoblast activity) ( $P_{\text{adj}}$   
169  $= 2.3 \times 10^{-4}$ ), the turquoise module was enriched for genes encoding extracellular matrix  
170 proteins ( $P_{\text{adj}} = 3.5 \times 10^{-25}$ ) (such as genes encoding for collagens ( $P_{\text{adj}} = 0.4 \times 10^{-10}$ )), and the  
171 purple module was enriched for genes involved in skeletal system development ( $P_{\text{adj}} = 2.3 \times 10^{-$   
172  $10}$ ) and osteoblast differentiation ( $P_{\text{adj}} = 2.0 \times 10^{-6}$ ) (**Figure 1 and Supplemental File 2**). Given  
173 that network modules represented distinct biological processes, including those involved in  
174 mineralization and osteoblast activity, we were confident it would provide a platform for

175 identifying core genes related to mineralization that potentially underlie BMD GWAS  
176 associations.

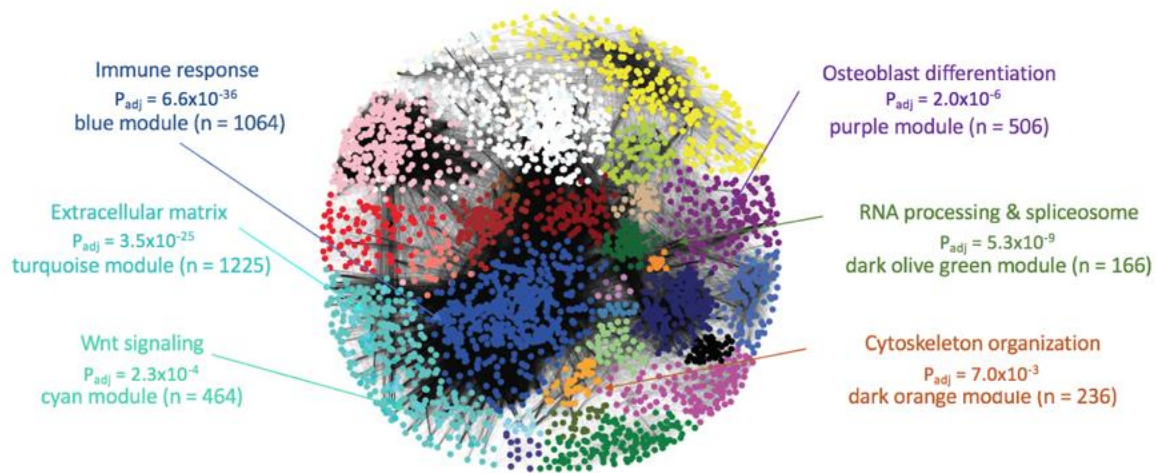

177  
178 **Figure 1.** *Weighted gene co-expression network generated using transcriptomic profiles from*  
179 *mineralizing osteoblasts.* The network was composed of 65 modules of co-expressed genes,  
180 many of which were enriched for specific biological processes relevant to osteoblasts.

## 181 182 II. Identification of co-expression modules enriched for genes implicated by GWAS

183 To identify modules of co-expressed genes informative for GWAS, we first determined if  
184 any of the 65 modules were enriched for genes that overlapped GWAS associations. Using data  
185 from the two largest GWASs performed at the time, one study of Dual Energy X-Absorptiometry  
186 (DEXA) derived areal BMD measures at the lumbar spine and femoral neck <sup>8</sup> (“Estrada *et al.*  
187 GWAS”; N=32,961) and one study of ultrasound determined heel estimated BMD (eBMD) <sup>9</sup>  
188 (“Kemp *et al.* GWAS”, N=142,487), we developed a list of 789 human genes (N<sub>Estrada</sub> = 179,  
189 N<sub>Kemp</sub> = 701, (91 shared genes)) intersecting BMD GWAS loci. A total of 723 (92%) of these had  
190 mouse homologs in the network (**Supplemental File 3 and 4**). Of the 65 modules in the  
191 network, 13 were enriched for mouse homologs of human genes implicated by BMD GWAS  
192 (Fisher’s exact test,  $P_{adj} < 0.05$ ) (**Supplemental File 5 and Figure 2A**). Additionally, we

193 performed stratified LD score regression by calculating the BMD heritability partitioned by SNPs  
194 surrounding genes in each module using the Kemp *et al.* GWAS<sup>9,25</sup>. We found 16 modules  
195 enriched for partitioned BMD heritability, including nine of the 13 enriched for BMD GWAS  
196 implicated genes (**Figure 2B and Supplemental File 6**).

197

### 198 **III. The purple module is enriched for genes with core-like properties**

199 Next, we focused on identifying which of the 13 modules identified above were enriched  
200 for genes with core-like properties. To accomplish this, we selected modules using biologically  
201 motivated criteria which likely reflected the properties of core genes. First, we compared the 13  
202 module eigengenes with *in vitro* mineralization using osteogenic cultures from the same 42 CC  
203 strains used in the construction of the co-expression network (**Supplemental Figure 1**). Only  
204 one, the purple module, had a pattern of expression that was significantly correlated with  
205 mineralization ( $r = 0.49$ ,  $P_{\text{adj}} = 0.012$ ), suggesting the purple module was enriched for genes  
206 with a direct role in mineralization (**Figure 2C and Supplemental Figure 2**).

207 Core genes have been broadly defined as those that directly influence a disease-  
208 relevant biological processes<sup>11,12</sup>. Thus, severe perturbation of a core gene is more likely to  
209 result in a significant impact on a phenotype, as in the case of a mouse knockout or human  
210 monogenic disease. We identified all gene knockouts that produced a bone phenotype, defined  
211 as either a change in BMD, bone mineral content (BMC), abnormal bone morphology, or  
212 abnormal bone cell activity, by utilizing mouse knockout phenotype data from several databases  
213<sup>26–29</sup> (**Supplemental File 7**). Of the 13 modules enriched for BMD GWAS genes, two were  
214 enriched for genes whose deficiency impacted bone in mice (**Figure 2D**). The purple module  
215 was the most significantly enriched ( $\text{OR}=5.4$ ,  $P_{\text{adj}} = 1.6 \times 10^{-34}$ ). We also compiled a list of 35  
216 known drivers of monogenic bone diseases associated with osteoblast dysfunction, including  
217 osteogenesis imperfecta, hyperostosis, and osteosclerosis (**Supplemental File 8**)<sup>30–34</sup>. Again,  
218 the purple module, containing 11 of 35 (31.4%) monogenic disease genes, was the most



219 significantly enriched (OR = 21.3,  $P_{adj} = 6.9 \times 10^{-9}$ ) (**Figure 2E**). Together, these independent  
 220 lines of evidence suggested the purple module was enriched for genes with core-like properties.  
 221

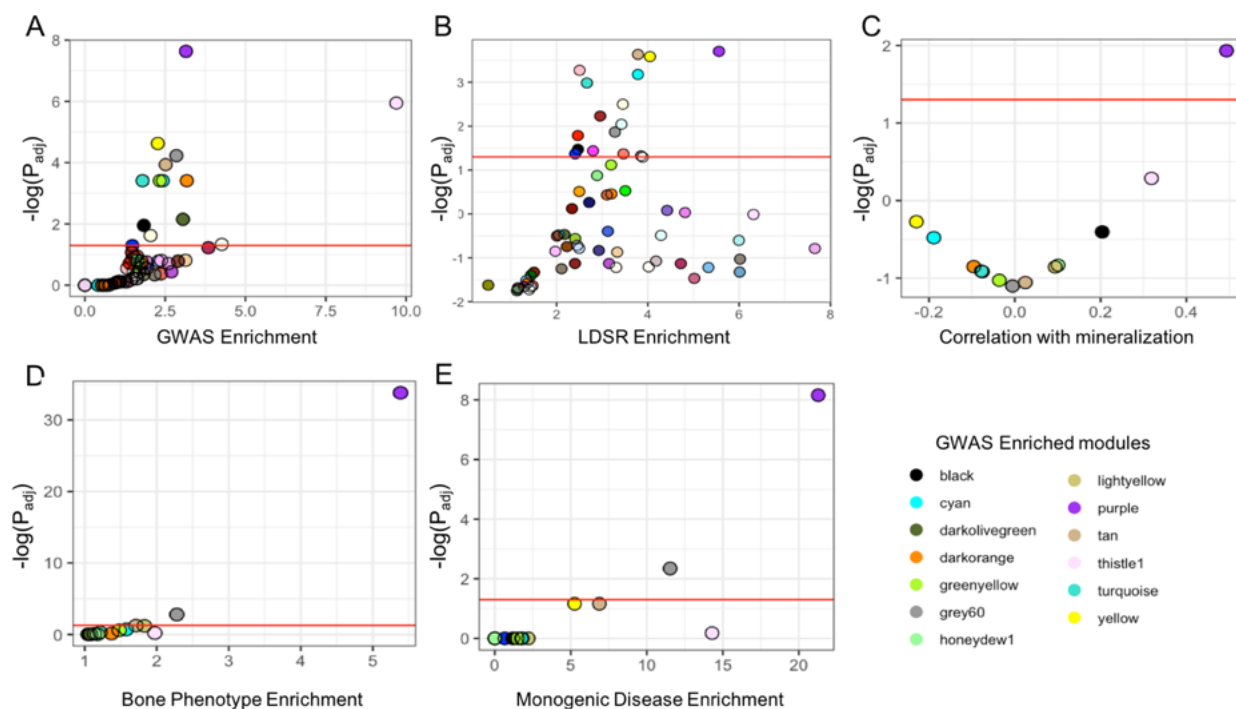

222 **Figure 2.** The purple module is enriched for genes with core-like properties. (A) Module  
 223 enrichments for genes overlapping a BMD GWAS association. (B) Enrichments for partitioned  
 224 BMD heritability for each module determined using stratified LD score regression. (C)  
 225 Correlation between each module eigengene and *in vitro* mineralization. (D) Module  
 226 enrichments for genes that, when knocked out, produced a bone phenotype and (E) human  
 227 monogenic bone disease genes. Red line in each panel represents  $P_{adj} < 0.05$ .  
 228

229  
 230 **IV. New BMD GWAS associations further support the purple module as a core gene**  
 231 **module**

232 While we were analyzing the Kemp *et al.* GWAS data, an extension of this study, with a  
 233 significantly increased eBMD sample size, was published (“Morris *et al.* GWAS”) <sup>14</sup>. The Estrada

234 *et al.* (N=32,961) and Kemp *et al.* (N=142,487) GWASs identified 56 and 307 conditionally  
235 independent associations, respectively <sup>8,9</sup>. In comparison, the Morris *et al.* GWAS (N=426,824)  
236 identified 1103 eBMD associations; an increase of over 3.5-fold <sup>14</sup>. The associations identified  
237 in the Morris *et al.* GWAS overlapped 1581 genes, as compared to 789 in the Estrada *et al.* and  
238 Kemp *et al.* GWASs (**Supplemental File 9**). Assuming the genetic architecture of BMD is  
239 consistent with the omnigenic model, we expected the inclusion of the Morris *et al.* GWAS data  
240 to increase the number of modules enriched for GWAS implicated genes. Consistent with this  
241 hypothesis, the number of modules enriched for GWAS-implicated genes doubled ( $N_{\text{Kemp}} = 13$ ,  
242  $N_{\text{Morris}} = 26$ ) using the Morris *et al.* GWAS (**Figure 3A**) (**Supplemental File 10**). As observed in  
243 the first analysis, most (18/26, 69%) of the new modules enriched for GWAS-implicated genes  
244 were also enriched for partitioned BMD heritability (**Supplemental File 11 and Figure 3C**).  
245 These new modules were enriched for genes involved in general biological processes such as  
246 RNA splicing (brown module,  $\text{P}_{\text{adj}} = 4.0 \times 10^{-11}$ ), cell junctions (floralwhite module,  $\text{P}_{\text{adj}} = 6.2 \times$   
247  $10^{-3}$ ), cell motor activity (orange,  $\text{P}_{\text{adj}} = 6.6 \times 10^{-3}$ ), the cell cycle (lightgreen,  $\text{P}_{\text{adj}} = 3.2 \times 10^{-4}$ ),  
248 ER to Golgi trafficking (salmon,  $\text{P}_{\text{adj}} = 1.8 \times 10^{-2}$ ), and the glycolytic process (red,  $\text{P}_{\text{adj}} = 1.1 \times$   
249  $10^{-13}$ ), and not processes specific to osteoblast activity and/or mineralization (**Supplemental**  
250 **File 2**).

251         Similar to the analysis of the Kemp *et al.* data, the purple module was among the most  
252 enriched for GWAS implicated genes ( $\text{OR} = 2.67$ ,  $\text{P}_{\text{adj}} = 3.4 \times 10^{-11}$ ) (**Figures 3A**) and BMD  
253 heritability captured ( $\text{OR} = 5.8$ ,  $\text{P}_{\text{adj}} = 4.7 \times 10^{-6}$ ) (**Figures 3B**). Using the Estrada *et al.* and  
254 Kemp *et al.* GWAS, the purple module contained 45 genes implicated by GWAS ( $\text{OR} = 3.15$ ,  
255  $\text{P}_{\text{adj}} = 2.3 \times 10^{-8}$ ) (5.7% of GWAS-implicated genes; 8.9% of purple module genes) and  
256 explained 27% of the SNP-heritability ( $h_{g2}$ ) in the study, or 4.6% of the total heritability. Using  
257 the Morris *et al.* GWAS, the number of purple module genes implicated by GWAS increased to  
258 77 ( $\text{OR} = 2.7$ ,  $\text{P}_{\text{adj}} = 3.4 \times 10^{-11}$ ) (4.9% of GWAS-implicated genes; 15.2% of purple module  
259 genes) explaining 25.3% of the  $h_{g2}$ , or 5.4% of the total heritability. Additionally, the purple

260 module was still the only one correlated with *in vitro* mineralization (**Figure 3D**), the most  
261 significantly enriched for genes eliciting a bone phenotype when knocked-out in mice (**Figure**  
262 **3E**), and human monogenic bone disease genes (**Figure 3F**). These data indicate that even  
263 with a significant increase in the number of GWAS-implicated genes included in the analysis,  
264 the purple module is the only one enriched for genes with core like properties.  
265

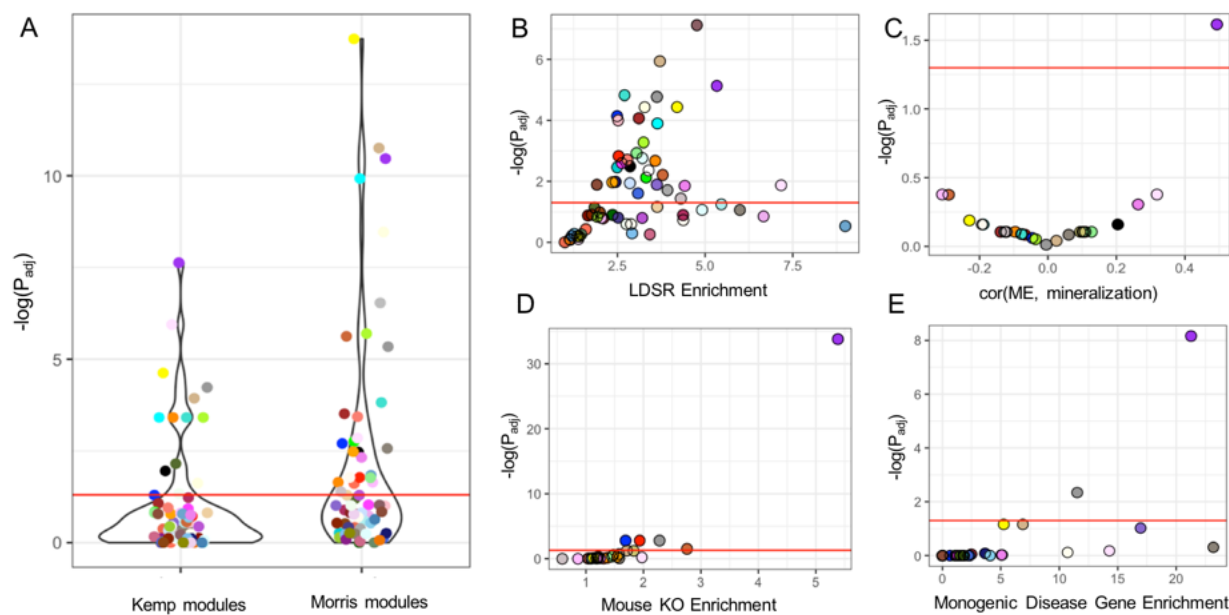

266  
267 **Figure 3.** The purple module was the only core module after increasing the number of analyzed  
268 GWAS associations by 3.5-fold. (A) A greater number of modules were identified as enriched for  
269 GWAS implicated genes in the Morris *et al.* GWAS versus the Kemp *et al.* GWAS. (B) Module  
270 enrichments for partitioned BMD heritability for each module determined using stratified LD  
271 score regression. (C) Correlation between each module eigengene and *in vitro* mineralization.  
272 (D) Module enrichments for genes that, when knocked out, produced a bone phenotype and (E)  
273 human monogenic bone disease genes. Red line in each panel represents  $P_{adj} < 0.05$ .

274  
275 **V. The purple module contains genes belonging to one of two distinct transcriptional**

## 276 programs across osteoblast differentiation

277 The purple module was enriched for GO categories important for the function of  
278 osteoblasts. Consistent with this observation, it contained many genes known to play key roles  
279 in osteoblast differentiation and mineralization, including *Runx2*<sup>13</sup>, *Sp7*<sup>35</sup>, *Sost*<sup>36,37</sup>, *Bglap*<sup>38</sup>,  
280 *Alpl*<sup>39</sup>, among many others (**Supplemental File 12**). Thus, to further investigate the purple  
281 module, we evaluated the expression of its genes with regards to osteoblast differentiation. To  
282 do this, we utilized transcriptomic profiles collected from purified osteoblasts at multiple time  
283 points across differentiation (GSE54461). Using k-means clustering, we found that the genes  
284 within the purple module clearly partitioned into two distinct transcriptional profiles with regards  
285 to differentiation (**Figure 4A,B**). We have termed these groups the Early Differentiation  
286 Submodule (EDS; high expression early and low expression late) (N=192 transcripts; 175  
287 unique genes) and the Late Differentiation Submodule (LDS; low expression early and high  
288 expression late) (N=423 transcripts; 323 unique genes).

289 We assessed whether there were differences between the EDS and the LDS with regard  
290 to network parameters and their enrichment for functional annotations seen in the purple  
291 module. We first looked at intramodular connectivity, measured by module membership  
292 (correlation between the expression of each gene and the module eigengene). On average,  
293 LDS genes had higher module membership scores than EDS genes ( $P = 3.0 \times 10^{-4}$ ) (**Figure**  
294 **4C**), suggesting they may play more critical roles in the context of overall module behavior.  
295 Additionally, the LDS was more significantly enriched for genes implicated by GWAS (OR = 3.0,  
296  $\text{Padj} = 5.2 \times 10^{-10}$ ), osteoblast relevant GO terms (e.g. “ossification” ( $\text{Padj} = 3.24 \times 10^{-14}$ ), skeletal  
297 development” ( $\text{Padj} = 9.6 \times 10^{-11}$ ), “osteoblast differentiation” ( $\text{Padj} = 1.4 \times 10^{-4}$ ), and “biomineral  
298 tissue development” ( $\text{Padj} = 4.1 \times 10^{-6}$ ), genes that when knocked-out result in a bone phenotype  
299 (OR = 7.3,  $\text{Padj} = 1.1 \times 10^{-33}$ ) and monogenic bone disease genes (OR = 33.2,  $\text{Padj} = 8.4 \times 10^{-$   
300  $11$ ) (Figure 4D). As one would expect based on their higher expression later in differentiation,  
301 many of the most well-known regulators of mineralization, such as *Phospho1*<sup>40</sup>, *Bglap*<sup>41</sup>,

302 *Fam20c*<sup>42</sup>, *Mepe*<sup>43</sup>, *Phex*<sup>44</sup>, to name a few, were members of the LDS (**Supplemental File**  
 303 **12**). These observations, together with the fact that LDS genes are expressed at high levels  
 304 during late differentiation, coincident with when the osteoblasts are actively mineralizing,  
 305 suggest that LDS contains genes with core-like properties specific for the process of  
 306 mineralization. For all downstream analyses we focused on the LDS.

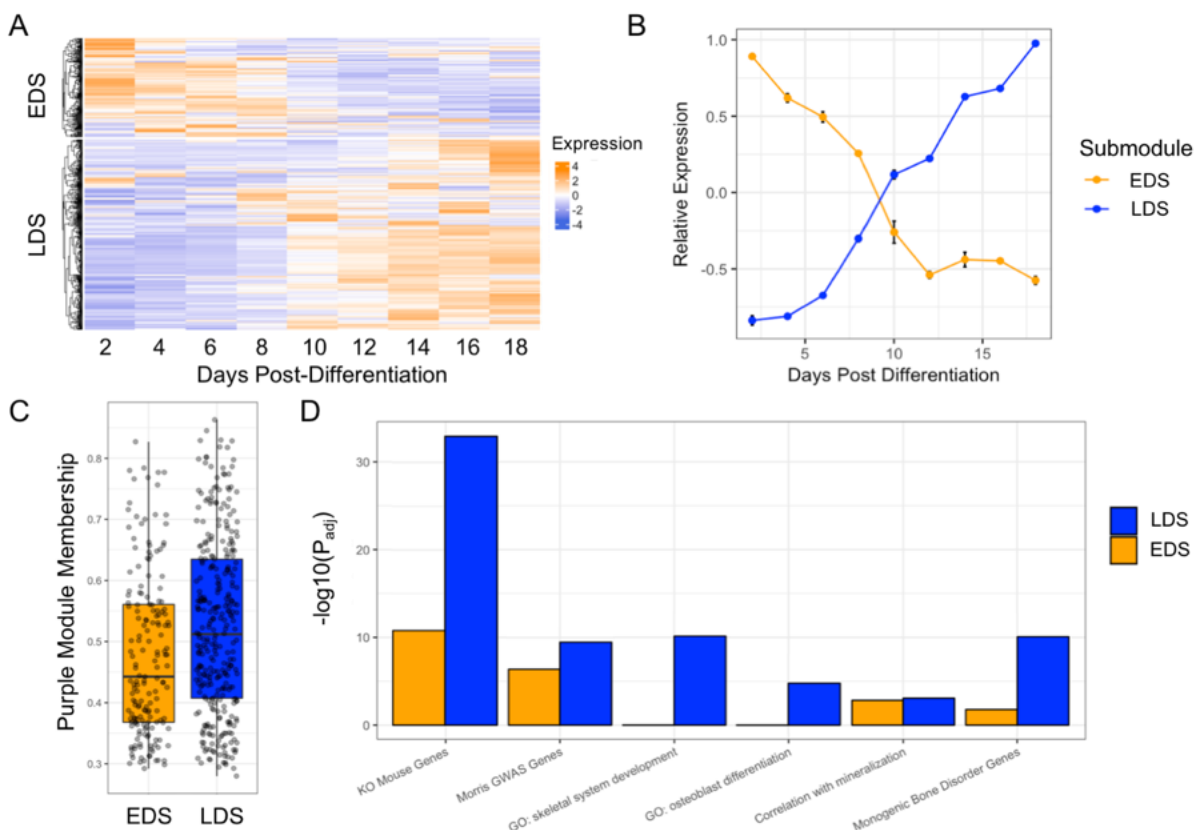

307  
 308 **Figure 4.** *The purple module consists of genes representing two distinct transcriptional profiles*  
 309 *across osteoblast differentiation, one of which, the late differentiation submodule (LDS), is more*  
 310 *enriched for genes with properties consistent with core genes for mineralization. (A) Purple*  
 311 *module genes show two distinct patterns of expression across differentiation, (B) Genes in*  
 312 *cluster 1 (or the early differentiation submodule; EDS; N=175 genes) are expressed high early*  
 313 *in osteoblast differentiation. Genes in cluster 2 (or the late differentiation submodule; LDS;*  
 314 *N=323 genes) are expressed high late in osteoblast differentiation. (C) LDS genes have a*  
 315 *significantly higher purple module membership score ( $P = 3.0 \times 10^{-4}$ ). (D) The LDS is more*

316 significantly enriched than the EDS for genes implicated by BMD GWAS in humans, associated  
317 with GO terms for bone development, for genes that when knocked out, produce a bone  
318 phenotype, and for genes involved in monogenic bone disorders.

319

## 320 **VI. BMD-associated variants in GWAS loci harboring LDS genes overlap active regulatory** 321 **elements in osteoblasts**

322 Based on the fact that the LDS is enriched for genes involved in osteoblast  
323 differentiation and that mineralization is fundamental in the regulation of BMD, we anticipate that  
324 many of the genes in the LDS are true core genes and causal genetic drivers of BMD. If true,  
325 then BMD-associated variants in associations harboring LDS genes should regulate the  
326 expression of LDS genes in osteoblasts. To test this, we utilized histone modification data from  
327 the Roadmap Epigenome Project <sup>45</sup>. In the Morris *et al.* BMD GWAS, 48 LDS genes overlapped  
328 84 associations (7.6% of the 1103 total; a subset of LDS genes overlapped multiple clustered  
329 associations). For each of the 84 independently associated lead (i.e., most significant) SNPs,  
330 we analyzed histone modifications across the osteoblast genome and observed that they were  
331 more likely to overlap regions marked by modifications associated with active regulatory  
332 elements such as H3K4me1 (2.8x enrichment,  $P < 1 \times 10^{-3}$ ), H3Kme2 (3.2x enrichment,  $P < 1 \times$   
333  $10^{-3}$ ), H3K4me3 (3.8x enrichment,  $P < 1 \times 10^{-3}$ ), and H3K27ac (2.6x enrichment,  $P < 1 \times 10^{-3}$ )  
334 relative to 1000 sets of random SNPs matched for allele frequency and distance from a  
335 transcription start site (**Figure 5**). Additionally, we observed depletion of LDS SNPs in  
336 heterochromatic regions, marked by H3K9me3 (0.14x depletion,  $P < 1 \times 10^{-3}$ ).

337 To determine if the enrichments were specific to osteoblasts, we calculated the ratio  
338 between the LDS BMD set overlap and the mean random set overlap across all 129 Roadmap  
339 tissues and cell-types. For all activating marks (H3K27ac, H3K4me1, H3K4me2, H3K4me3)  
340 osteoblasts were in the top 10% when tissues were ranked based on the overlap ratio  
341 (**Supplemental File 13**). The tissues for which the random sets had a higher ratio included cell

342 types within the same lineage as osteoblasts, such as mesenchymal stem cell (MSC) derived  
343 chondrocytes and other MSC-derived tissues including adipose and skeletal muscle. These  
344 data support the premise that loci harboring LDS genes impact BMD through the regulation of  
345 gene expression in osteoblasts, further supporting the causality of LDS genes.

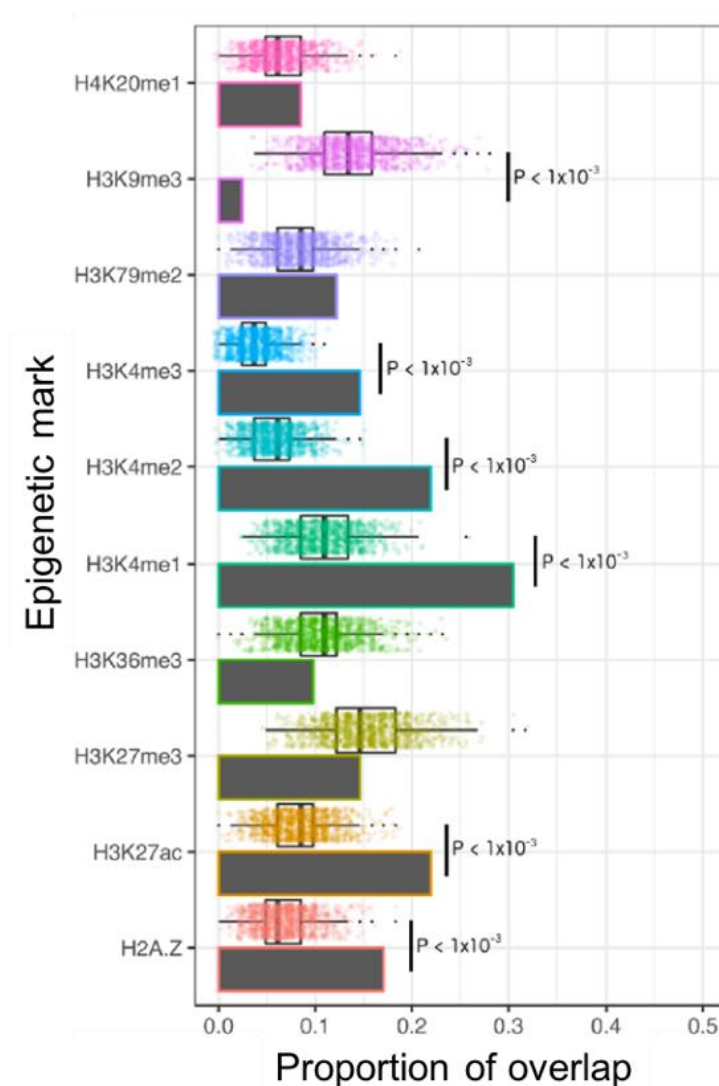

346  
347 **Figure 5.** Lead SNPs for GWAS associations harboring LDS genes overlap active regulatory  
348 elements in osteoblasts. Grey bars represent the proportion of LDS SNPs (n = 84) that overlap  
349 each of the epigenetic marks measured in osteoblasts. Box and dot plots represent the  
350 proportion of each set of random SNPs (N = 1000) (matched to the LDS SNPs for MAF and  
351 distance from TSS) overlapping each epigenetic mark measured in osteoblasts.

352

353 **VII. LDS genes *CADM1*, *B4GALNT3*, *DOCK9*, and *GPR133* are novel genetic determinants**  
354 **of BMD**

355 The overarching goal of this study was to identify causal genes from a module enriched  
356 for genes with core-like properties underlying BMD GWAS associations. As described above, 48  
357 (14.9%) LDS genes overlapped an eBMD GWAS association from the Morris *et al.* study. To  
358 further identify those with strong evidence of being causal, we utilized expression quantitative  
359 trait locus (eQTL) data from the Gene Tissue Expression (GTEx) project to identify local eQTL  
360 colocalizing with BMD associations <sup>46</sup>. We also used total body BMD data on LDS gene  
361 knockouts collected as part of the International Mouse Phenotyping Consortium (IMPC) <sup>27</sup>.  
362 Together, these data allowed us to directly link BMD associated variants to LDS genes and LDS  
363 genes to pathways regulating BMD. We performed a colocalization analysis for each  
364 eQTL/BMD association pair for all 48 genes in 48 GTEx tissues and identified 12 LDS genes  
365 with colocalizing eQTL ( $PP4 > 0.7$ ) (**Supplemental File 14 and Figures 6A, B, C, and D**). We  
366 also queried each of 12 LDS genes with a colocalizing eQTL and found that BMD had been  
367 measured by the IMPC in 5 mutants. Of these, four genes (*Cadm1*, *B4galnt3*, *Dock9*, and  
368 *Adgrd1*) had significantly altered total body BMD ( $P_{adj} < 0.05$ ) (**Supplemental File 15 and**  
369 **Figures 6E, F, G and H**). For *Cadm1* and *Dock9* the direction of effect inferred from the  
370 eQTL/BMD association matched the direction of the effect observed in the mouse knockout;  
371 however, for *B4galnt3* and *Adgrd1* the directions did not match (**Supplemental File 15**).

372 Lastly, we evaluated network parameters of *Cadm1*, *B4galnt3*, *Dock9* and *Adgrd1*. We  
373 observed that *Cadm1* and *B4galnt3* were ranked in the top 20 based on LDS connectivity  
374 (**Supplemental File 12**). In fact, *Cadm1* was the 2nd most highly connected gene. Together,  
375 the four genes had, on average, higher module membership than the average LDS gene (0.72  
376 vs. 0.52;  $P = 0.002$ ). In support of the importance of connectivity in the LDS, we observed that  
377 more highly connected LDS genes were more likely ( $P=0.008$ ) to overlap a BMD GWAS locus



378 (Supplemental Figure 3A) and there was a strong positive correlation between connectivity  
 379 and *in vitro* mineralization for all LDS genes ( $r = 0.71$ ,  $P < 2.2 \times 10^{-16}$ ) (Supplemental Figure  
 380 3B). These data suggest that connectivity is an important feature of the LDS and a strong proxy  
 381 for biological importance. Furthermore, these data strongly support *CADM1*, *B4GALNT3*,  
 382 *DOCK9* and *ADGRD1* as genetic drivers of BMD in humans.

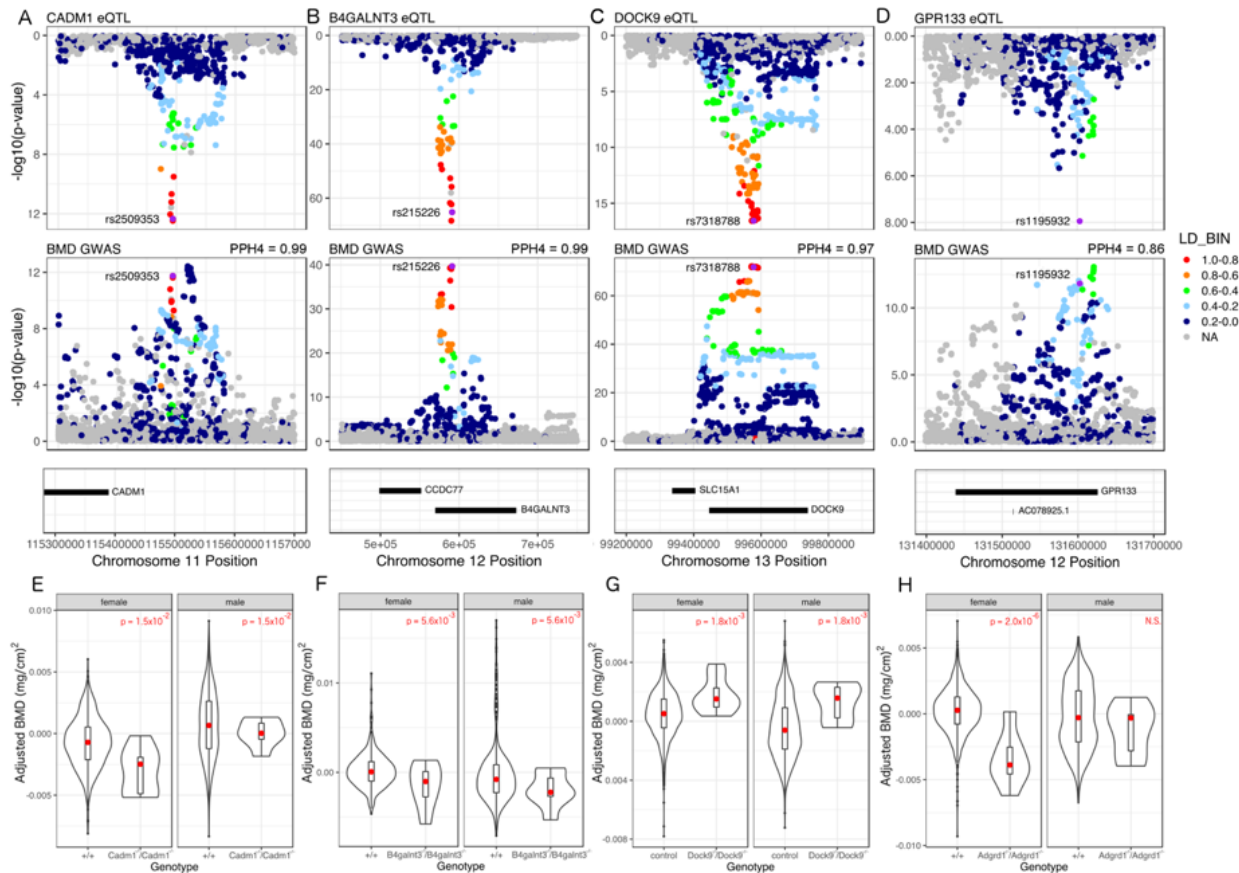

383

384

385 **Figure 6.** *CADM1*, *B4GALNT3*, *DOCK9*, and *ADGRD1* (aka *GPR133*) are novel genetic  
 386 regulators of BMD. (A-D) All four genes have an eQTL in at least one tissue in the GTEx  
 387 database that colocalizes with a proximal BMD GWAS association. (E-H) Knockout mice from  
 388 the KOMP for each gene exhibit altered BMD.

389

390

391

## 392 **Discussion**

393 Osteoporosis is an increasingly common disease associated with reduced BMD and  
394 negative health outcomes, namely fracture <sup>1</sup>. Despite its significant genetic component, we do  
395 not fully understand the genes and mechanisms that influence osteoporosis and its  
396 determinants, such as BMD. Moreover, current therapeutics for osteoporosis have been  
397 associated with rare side effects, leading to decreased compliance <sup>47</sup>. Identification of the causal  
398 genes with core-like properties that regulate BMD will help us to further understand the etiology  
399 of osteoporosis and lead to the development of novel therapeutics. In this study, we identified  
400 the LDS, a co-expression submodule enriched for genes with core-like properties influencing  
401 BMD, by integrating a cell- and timepoint-specific co-expression network with the results of BMD  
402 GWAS. We then used this information to identify four LDS genes that overlapped GWAS loci,  
403 had colocalizing eQTL, and altered BMD in knockouts, suggesting they are causal for their  
404 respective BMD GWAS association.

405 In this work, we hypothesized that the genes underlying BMD GWAS associations are  
406 not created equal with respect to “biological importance” or membership in pathways with direct  
407 impacts on bone mass. Substantial prior evidence supports this prediction <sup>48,49</sup> and it is one of  
408 the primary tenets of the omnigenic model <sup>11,12</sup>. Identification of genes whose activity or function  
409 is more proximal to BMD is important for a number of reasons. First, the identification of genes  
410 with core-like properties has the potential to identify critical new players in pathways known to  
411 directly impact bone and to uncover new processes essential to skeletal growth and  
412 maintenance. Second, it provides a way to prioritize hundreds of BMD GWAS loci for further  
413 investigation. Third, based on their central role in the regulation of BMD, it is logical to use the  
414 concept of a core gene as a way to prioritize gene discovery in the context of selecting  
415 promising new therapeutic targets for evaluation.

416 The omnigenic model uses a strict statistical definition to define core genes and many

417 have debated the utility of this designation<sup>11,15–17</sup>. Some have argued that focusing on core  
418 genes underestimates the complexity of complex traits, attributing biologically nuanced diseases  
419 to a small set of genes<sup>13</sup>. Others have argued that the focus should not be on thoroughly  
420 defining core genes, but instead on identifying the underlying biological pathways and  
421 mechanisms<sup>14</sup>. In practice, it is likely that the designation of core genes follows a spectrum  
422 rather than a discrete classification. If so, then it should be possible to rank genes based on  
423 their continuous “core” attributes, which would be analogous to ranking genes based on their  
424 proximity to a disease or phenotype. In essence, that is what we have done in the current study  
425 with the goal of identifying genes on the end of the “core” attribute distribution for mineralization.  
426 Importantly, it is not likely that all genes in the LDS are causal genetic drivers or, if they are  
427 causal, it is possible that several will have few core attributes. However, based on our analysis  
428 and results, it is likely that many are causal genes that participate in “core” pathways and  
429 processes that directly impact mineralization, bone formation, and BMD.

430       As we have previously demonstrated<sup>50,51</sup>, there are a number of advantages to using  
431 co-expression networks to inform GWAS. First, it allowed us to group genes across the genome  
432 based on function and pathway membership and then identify groups of functionally similar  
433 genes that had core-like properties. Second, it allowed us to predict the function of potentially  
434 casual genetic drivers of BMD. Based on the strong GO enrichments and membership of genes  
435 with well-known roles in bone formation and mineralization, it is likely that all LDS genes,  
436 including those with no known function, impact mineralization in some manner. The idea of the  
437 LDS playing a central role in bone formation was further supported by the strong overlap  
438 observed between lead BMD GWAS SNPs for associations containing LDS genes regulatory  
439 elements in osteoblasts. Third, it begins to provide a systems-level context for causal genetic  
440 drivers. Once genes underlying GWAS loci are identified it is then important to begin to  
441 understand their role in complicated cellular networks, defining how a set of genetic variants  
442 may converge on multiple genes all involved in a particular process. We can use the LDS to

443 begin to identify sets of variants that all work to influence genes which impact mineralization and  
444 the hierarchy of relationships between these genes.

445         This work extends our use of co-expression networks to inform GWAS. Previously, we  
446 used a network generated using cortical bone expression profiles from the Hybrid Mouse  
447 Diversity Panel to identify two “osteoblast” modules (enriched for genes involved in osteoblast  
448 differentiation and function) enriched for genes implicated by BMD GWAS. We used these  
449 modules to identify 35 genes potentially causal for GWAS loci, including two (*MARK3* and  
450 *SPTBN1*) that we experimentally validated their involvement in BMD. Comparing the two  
451 modules to the LDS we observed a modest overlap (96 of 323 genes; 29.7%), even though they  
452 both demonstrated a strong “osteoblast” enrichment signature. While a number of differences  
453 (microarray vs. RNA-seq transcriptomic data, different mouse populations, etc.) confound the  
454 interpretation of the seemingly low overlap, it is likely due in large part to our use of osteoblast-  
455 specific network capturing the transcriptome at peak mineralization instead of the whole bone  
456 tissue representing a small number of osteoblasts.

457         We provided strong supporting evidence that four LDS genes (*CADM1*, *B4GALNT3*,  
458 *DOCK9* and *GPR133*) are novel regulators of BMD and causal for their respective GWAS  
459 association. Prior to this study, none of these genes had been directly connected to the  
460 regulation of BMD. *CADM1* (Cell Adhesion Molecule 1) is a ubiquitously expressed cell  
461 adhesion molecule involved in many biological processes, including cancer, spermatogenesis,  
462 and neuronal/mast/epithelial cell function<sup>52-54</sup> that had been implicated in osteoclast proliferation  
463 and activity<sup>55</sup> and as an osteoblast-specific marker in the context of osteosarcoma<sup>56,57</sup>.  
464 *B4GALNT3* (Beta-1,4-N-Acetyl- Galactosaminyltransferase 3) is a glycosyltransferase that  
465 transfers N-acetylgalactosamine (GalNAc) onto glucosyl residues, thus forming N,N-prime-  
466 diacetyllactoseadamine (LacdiNAc), which serves as a terminal structure of cell surface N-  
467 glycans that contributes to cell signaling<sup>51,52</sup>. *B4GALNT3* is expressed in bone and associated  
468 with circulating levels of sclerostin<sup>53-55</sup>. *DOCK9* (Dedicator of Cytokinesis 9) is a guanine

469 nucleotide-exchange factor (GEF) that activates Cdc42<sup>58</sup>, which has been shown to regulate  
470 osteoclast differentiation and ossification<sup>57,58</sup>. *GPR133* (Adhesion G Protein-Coupled Receptor  
471 D1) is a G protein-coupled receptor that participates in cell-cell and cell-matrix interactions<sup>59</sup>.  
472 Our results demonstrate the utility of the LDS in broadening our understanding of the molecular  
473 and genetic basis of BMD.

474 Our study is not without limitations. First, we used gene expression data from the mouse  
475 as a discovery platform, however this may limit the translational applications of the work due  
476 biological differences and missing homologs between mouse and human. Secondly, this was  
477 not a comprehensive study of the genetic effects driving osteoporosis, because we focused  
478 exclusively on the contributions of just one cell type, bone-forming osteoblasts. In future work,  
479 this approach could also be applied to other bone cell types. For example, one could use *in vitro*  
480 measures of osteoclast activity as a filter to identify groups of genes influencing bone resorption,  
481 and ultimately BMD. Finally, the eQTL comparisons made in this study were not derived from  
482 expression data in bone tissue, as bone tissue expression was not measured in the GTEx  
483 project. While we identified colocalizing eQTL in other tissues, these eQTL may be irrelevant to  
484 BMD or the direction of eQTL effects in non-bone tissues may not reflect the direction of effect  
485 in osteoblasts.

486 While we identified four novel regulators of bone mineral density, there is still much to be  
487 gleaned from the late differentiation submodule. The LDS is a promising resource for two key  
488 applications: (1) causal gene discovery and functional follow up and (2) studying the impact of  
489 genetic variation on biological networks and complex phenotypes. There are still many genes  
490 with no known connection to BMD in the LDS that are likely important to osteoblast biology and  
491 mineralization. Additionally, the LDS is not just a list of candidate genes; it also provides insight  
492 into the molecular hierarchy driving osteoblast differentiation and mineralization, which can  
493 demonstrate how genetic variation impacts biological networks. The network topology of the  
494 LDS can also be used to infer the causal relationships between genetic variants and the many

495 genes that influence osteoblast activity. Moving forward, the LDS can serve as a platform for the  
496 identification of novel determinants of BMD and for furthering our understanding of the nuanced  
497 relationship between genetic variation, molecular phenotypes, and complex traits.

498 In summary, we have used an integrative, network-based method to identify core genes  
499 for the process of mineralization and BMD. While the definition of a core gene is still open to  
500 debate, we found the expected properties of core genes are effective lenses through which to  
501 contextualize GWAS associations. Integrating gene co-expression networks, GWAS data, *in*  
502 *vitro* and *in vivo* phenotypic data reflecting “core” properties, and eQTL information has led us to  
503 a more complete understanding of the biology and genetics of BMD.

504

## 505 **Methods**

506 **RNA-seq:** Neonatal collaborative cross heads were received from the University of North  
507 Carolina. At UNC, neonatal (3-5 days) collaborative cross mice were euthanized by CO<sub>2</sub>,  
508 decapitated onto paper towels soaked in 70% ethanol, and placed in cold PBS on ice for  
509 overnight shipping. Once received, calvaria were dissected, paying special attention to brain  
510 and interparietal bone removal. Isolated calvaria were placed in 24 well plates containing 0.5 mL  
511 of digest solution (0.05% trypsin and 1.5 U/ml collagenase P) and incubated on a rocking  
512 platform at 37 degrees during six, fifteen-minute digestions in 0.5 mL of digestion solution.  
513 Fraction 1 is discarded and fractions 2-6 are collected. Fractions 2-6 are added to an equal  
514 volume of cold plating media (89 mL DMEM, 1 mL 100x Pen/Strep solution, and 10 mL Lot  
515 tested FBS). The resulting cells are filtered using a 70-100 mm cell strainer to remove clots,  
516 centrifuged at 1000 rpm for 5 minutes and re-suspended in 0.5 ml plating media. The resulting  
517 cells are plated in a T25 flask. 24 hours later, cells are washed with PBS, treated with trypsin,  
518 counted, and plated at a density of 1.5x10<sup>5</sup> cells per well in a 12-well plate, and allowed to grow  
519 to confluence for 48 hours. After 48 hours of growth, cells are switched to differentiation media  
520 (10 mL lot tested FCS, 1 mL 100x Pen/Strep solution, 283.8 uL ascorbic acid (0.1 M), 400 uL B-

521 glycerol phosphate (1 M), and 88.3 mL alpha-MEM per 100 mL) and allowed to differentiate for  
522 10 days. On day 10, total RNA was extracted from the mineralized cultures using *mirVana* RNA  
523 isolation kit (ThermoFisher Scientific).

524 RNA-Seq libraries were constructed from 200 ng of total RNA using Illumina TruSeq  
525 Stranded Total RNA with Ribo-Zero Gold sample prep kits (Illumina, Carlsbad, CA). Constructed  
526 libraries contained RNAs >200 nt (both unpolyadenylated and polyadenylated) and were  
527 depleted of cytoplasmic and mitochondrial rRNAs. An average of 39.7 million 2 x 75 bp paired-  
528 end reads were generated for each sample on an Illumina NextSeq 500 (Illumina, Carlsbad,  
529 CA). FastQC was used to evaluate the quality of the reads, and all samples passed the QC  
530 stage <sup>59</sup>. Reads were mapped to the eight collaborative cross founder transcriptomes based on  
531 build mm9 using Bowtie, and quantified using EMASE <sup>60</sup>. EMASE output transcript level  
532 expression estimates calculated by assigning multi-mapping reads across the genome using  
533 and expectation-maximization algorithm to allocate reads that differentiate between genes, then  
534 isoforms of a gene, and then alleles.

535  
536 **WGCNA network construction:** Estimated transcript count data was used as the basis for co-  
537 expression network construction. We removed transcripts with less than an average tpm  $\leq 0.3$   
538 tpm across all samples, resulting in 29,000 transcripts used to construct the network. We used a  
539 variance stabilizing transformation from the DESeq2 package that decouples the variance from  
540 the mean <sup>61</sup>. Next, we used PEER in order to remove latent confounding batch effects from our  
541 data <sup>62</sup>. As per PEER recommendations, we estimated PEER factors equal to one quarter of the  
542 number of samples (N = 24) and included covariates in the calculation. We carried out the  
543 downstream analysis with the residual values from PEER transformation. Finally, we used  
544 quantile normalization to match the distribution of each of the samples in the analysis.

545 The resulting expression data was used to construct a signed, weighted gene co-  
546 expression network using the weighted gene co-expression network analysis (WGCNA)

547 package <sup>63</sup>. There were no evident outliers from the hierarchical clustering analysis. The  
548 pickSoftThreshold() function from the wgcna package was used to determine the power used to  
549 calculate the network. The minimum power value that had an  $R_2 \geq 0.9$  for the scale-free  
550 topology model fit was used, and the network was calculated using a power of 9. We then used  
551 the blockwiseModules() function to construct a signed network with a merge cut height of 0.15,  
552 and a minimum module size of 20 genes. Using WGCNA, we constructed a signed network  
553 composed of 65 modules of co-expressed genes, with an average of 292 genes per module.

554

555 **Gene Ontology Analysis:** For those modules that were enriched for BMD GWAS genes, we  
556 conducted gene ontology analysis to identify the functional categories represented by each  
557 module. Using the ToppFun tool on the ToppGene site, we identified the significantly enriched  
558 categories for GO molecular functions, GO biological processes, GO cellular components,  
559 human and mouse phenotypes, and pathways <sup>64</sup>. The significance cutoffs reported for these  
560 enrichments were Benjamini & Hochberg corrected FDR q-values.

561

562 **Creating BMD GWAS list:** In order to identify co-expression modules enriched for BMD GWAS  
563 genes, we identified all genes overlapping a BMD GWAS locus using the 2012 and 2017 BMD  
564 GWAS <sup>8,9</sup>. For each BMD locus, a bin was defined by the furthest upstream and downstream  
565 SNPs with LD  $\geq 0.7$  as calculated from the European populations in the 1000 genomes phase  
566 III data identified using the LDLink LDProxy tool <sup>65</sup>. Then, using the Genomic Ranges tool, we  
567 identified all genes from the GRCh37/hg19 Ensembl gene set overlapping a BMD GWAS bin  
568 <sup>66,67</sup>. If not gene intersected a bin, we identified the nearest upstream and downstream genes  
569 from the bin. The Estrada GWAS resulted in 179 genes and the eBMD GWAS resulted in 701  
570 genes, resulting in a list of 731 unique genes. We converted the list of human genes to mouse  
571 homologs.



572

573 **BMD GWAS gene enrichment:** In order to identify modules of genes enriched for GWAS  
574 genes, we used a fisher's exact test to measure the statistical significance of the representation  
575 of GWAS genes in each module. We then applied a Bonferroni correction to correct for testing  
576 the enrichment of all 65 modules, and applied a significance cutoff of 0.05 to the adjusted p-  
577 values, resulting in 13 modules of genes enriched for 2012 and 2017 GWAS genes, and 26  
578 modules of genes enriched for 2012, 2017, and 2018 GWAS genes.

579

580 **LD Score Regression:** In order to evaluate the relevance of the BMD GWAS gene enriched  
581 modules we calculated the partitioned heritability of the SNPs in the regions surrounding the  
582 genes in each module. We used the LD score regression method, which takes gene lists as an  
583 input and returns the enrichment of the associated SNP set for heritability for the tested trait. For  
584 each set of modules we tested using this method, we corrected the enrichment p-values for  
585 multiple testing using a Bonferroni correction, and applied a p-value cutoff of 0.05 to the  
586 adjusted p-values.

587

588 ***In vitro* mineralization measurement and correlation:** In order to identify the modules of  
589 coexpressed genes with patterns of expression correlated with mineralization, we measured *in*  
590 *vitro* mineralization in osteogenic cells from the calvaria of 42 strains of collaborative cross mice.  
591 After 10 days of differentiation and mineral production, cells are washed with PBS and treated  
592 with 10% NBF (1 mL per well) and incubated at room temperature for 15 minutes. The NBF is  
593 removed and cells are washed with H<sub>2</sub>O (1mL x 2). Next, wells are stained with alizarin red ( 0.5  
594 mLs, 40 mM @ pH 5.6) for 20 minutes on a shake plate at 120 rpm. Alizarin red stain is then  
595 removed, and cells are washed 5 times with deionized H<sub>2</sub>O for 5 minutes on a shake plate at  
596 180 rpm. Once rinsed, the mineralized wells are scanned, and .tiff images are retained to

597 extract geometric parameters of the mineral deposits. After imaging, the wells are de-stained by  
598 incubation with 5% perchloric acid (1 mL) at room temperature for 5 minutes while shaking at  
599 120 rpm. Eluent is collected and read at 405 nm. The levels of *in vitro* mineralization varied  
600 significantly across the population, with a 63-fold change from the highest to lowest  
601 mineralization samples (max\_mmAR = 2.995993, min\_mmAR = 0.04719).

602 In this population, *in vitro* mineralization had a heritability of 47.8% ( $p=1.8 \times 10^{-46}$ ),  
603 indicating that the between-strain variation is larger than the within strain variation and that there  
604 is a genetic contribution to the process of mineralization. Using the WGCNA package, the  
605 eigengene of each module was calculated, and the correlation between the eigengene and the  
606 *in vitro* mineralization phenotype was calculated using the `cor()` function in R. The p-values  
607 associated with the correlation between the module eigengenes and *in vitro* mineralization were  
608 corrected for multiple testing using a Bonferroni correction and a p-value cutoff of 0.05 was  
609 applied to the adjusted p-values.

610

### 611 **Module enrichment for genes with associated bone phenotypes and monogenic bone**

612 **disease:** In order to identify modules of coexpressed BMD GWAS genes that are enriched for  
613 genes with bone phenotype annotations, we curated a list of genes which produce a bone  
614 phenotype when knocked out. We used four databases of gene perturbations that result in bone  
615 phenotypes, including genes annotated with a bone phenotype in the Mouse Genome  
616 Informatics database (MGI), the Origins of Bone and Cartilage Disease (OBCD) database, the  
617 International Mouse Phenotyping Consortium (IMPC), and the Bonebase Database <sup>26–29</sup>.

618 Specifically, we pulled BMD, altered bone morphology, altered bone cell activity, changes in  
619 ossification or mineralization, or association with a known bone disease from the MGI database.

620 The OBCD database contained genes with changes in bone mineral content (BMC), bone  
621 volume fraction (BV/TV), and BMD of the femur and BMD of the vertebra. We mined the IMPC  
622 database for any genes with altered BMD, and we pulled all Bonebase genes with altered

623 BV/TV in the femur or vertebra. This resulted in a list of 923 unique “bone” genes

624 (**Supplemental File 7**).

625 We also curated a list of genes associated with monogenic bone disorders using a  
626 literature review, specifically focusing on genes that disrupt osteoblast function, leading to  
627 monogenic bone disorders<sup>30–34</sup> (**Supplemental File 8**). We used a fisher’s exact test to  
628 measure the statistical significance of the representation of genes with associated mouse  
629 knockout bone phenotypes and monogenic bone disease in each module. We then applied a  
630 Bonferroni correction to correct for testing the enrichment of all 13 or 26 modules and applied a  
631 significance cutoff of 0.05 to the adjusted p-values.

632

633 **Clustering analysis in osteoblast differentiation gene expression data:** We investigated the  
634 expression profiles of all purple module genes in the context of differentiation. Using gene  
635 expression data from osteoblasts throughout differentiation (Series GSE54461), we used k-  
636 means clustering to identify differentiation-related transcriptional programs in the purple module.  
637 We tested  $k = 1:5$ , and found two robust clusters of genes within the purple module. Enrichment  
638 analysis of the two clusters in all function categories were conducted as described above.

639

640 **Epigenetic enrichment analysis for LDS BMD GWAS associations:** For BMD GWAS lead  
641 SNP (and proxies with  $LD \geq 0.7$ ) overlapping an LDS gene ( $n = 84$ ), GenomicRanges<sup>66</sup> was  
642 used to calculate the proportion of lead SNPs overlapping regions marked by epigenetic  
643 modifications, including H3K4me1, H3K4me2, H3K4me3, H3K9me3, H3K27ac, H3K27me3,  
644 H3K26me3, H3K79me2 and H4K20me1, and histone H2AZ from the Roadmap Project<sup>45</sup>. Using  
645 the GenomicRanges function `findOverlaps()`, we quantified the overlap between the LDS-  
646 associated lead SNPs and each epigenetic mark. To assess the enrichment of this overlap, we  
647 compared against 1000 sets of control SNPs ( $n = 84$ ). We chose sets of control SNPs that were

648 within +/- 20% of the mean distance from a transcription start site for the BMD GWAS lead  
649 SNPs, and within +/- 20% of the mean minor allele frequency of the BMD GWAS lead SNPs. P-  
650 values were calculated by taking the proportion of random sets of SNPs with a more extreme  
651 enrichment in the tail of the distribution with which we are comparing our experimental  
652 proportion. If the experimental proportion is more extreme than any measured random set, the  
653 p-value is reported as  $< 1 \times 10^{-3}$ . This same procedure was used to evaluate the tissue specificity  
654 for each mark. For each mark, the overlap with the LDS BMD SNP set and the 1000 random  
655 SNP sets were computed and the ratio between the proportion of overlapping LDS BMD SNPs  
656 and the mean proportion of overlapping random SNPs was computed. Higher ratios indicated  
657 greater enrichment of the LDS BMD SNPs over random SNPs with a given mark in a given  
658 tissue.

659  
660 **Colocalization analysis:** For each gene in the LDS that overlapped a BMD GWAS association  
661 from the Morris *et al.* study, eQTL from all GTEx tissues were identified <sup>10,46</sup>. Using the coloc  
662 package, we assessed the potential for colocalization between the QTL for BMD and the  
663 proximal cis-eQTL <sup>68</sup>. Two associations were considered to colocalize if the posterior probability  
664 of hypothesis four (PPH4), which is the probability of colocalization, is  $> 0.7$ . The RACER  
665 package to plot the two associations in a mirrorPlot <sup>69</sup>.

666  
667 **Mouse phenotype statistical comparisons:** Using the International Mouse Phenotyping  
668 Consortium (IMPC) database, we identified genes from the LDS that had eQTL that colocalized  
669 with BMD QTL and exhibited a difference in BMD when knocked out in mouse <sup>27</sup>. Using the  
670 PhenStat package, we analyzed the differences between control and knockout animals using a  
671 mixed model framework <sup>70</sup>. The specific equation used for each analysis are in **Supplemental**  
672 **File 15.**

673

674 **Network Topology Analysis:** A t-test was used to compare the module membership of the four  
675 causal genes and the remainder of the LDS genes and the connectivity of the LDS genes  
676 overlapping a BMD GWAS locus as opposed to those that do not. A linear model was used to  
677 assess the relationship between gene connectivity and gene correlation with *in vitro*  
678 mineralization.

679

680 **Acknowledgements:** Research reported in this publication was supported by the National  
681 Institute of Arthritis and Musculoskeletal and Skin Diseases of the National Institutes of Health  
682 under Award Number R01AR064790 to C.L.A-B. and C.R.F. O.L.S. was supported by a Wagner  
683 Fellowship from the University of Virginia. The Genotype-Tissue Expression (GTEx) Project was  
684 supported by the Common Fund of the Office of the Director of the National Institutes of Health,  
685 and by NCI, NHGRI, NHLBI, NIDA, NIMH, and NINDS. The data used for the analyses  
686 described in this manuscript (v7) were obtained from: the GTEx Portal on 01/11/2018. The  
687 International Mouse Phenotyping Consortium is partially funded by the NIH Knockout Mouse  
688 Programme (KOMP) project and the IMPC informatics and the data portal are supported by NIH  
689 grant U54 HG006370.

690

691

692

693

694

695

696

697

698 **References:**

- 699 1. Black, D. M. & Rosen, C. J. Clinical Practice. Postmenopausal Osteoporosis. *N.*  
700 *Engl. J. Med.* 374, 254–262 (2016).
- 701 2. Johnell, O. & Kanis, J. A. An estimate of the worldwide prevalence and disability  
702 associated with osteoporotic fractures. *Osteoporos. Int.* 17, 1726–1733 (2006).
- 703 3. Ralston, S. H. & Uitterlinden, A. G. Genetics of osteoporosis. *Endocr. Rev.* 31,  
704 629–662 (2010).
- 705 4. Zheng, H.-F., Spector, T. D. & Richards, J. B. Insights into the genetics of  
706 osteoporosis from recent genome-wide association studies. *Expert Rev. Mol. Med.*  
707 13, e28 (2011).
- 708 5. Ralston, S. H. & de Crombrughe, B. Genetic regulation of bone mass and  
709 susceptibility to osteoporosis. *Genes Dev.* 20, 2492–2506 (2006).
- 710 6. Sabik, O. L. & Farber, C. R. Using GWAS to identify novel therapeutic targets for  
711 osteoporosis. *Transl. Res.* (2016). doi:10.1016/j.trsl.2016.10.009
- 712 7. Hsu, Y.-H., Farber, C. R. & Kiel, D. P. Genetic determinants of bone mass and  
713 osteoporotic fracture. *Principles of Bone Biology* 1615–1630 (2020).  
714 doi:10.1016/b978-0-12-814841-9.00068-3
- 715 8. Estrada, K. *et al.* Genome-wide meta-analysis identifies 56 bone mineral density  
716 loci and reveals 14 loci associated with risk of fracture. *Nat. Genet.* 44, 491–501  
717 (2012).
- 718 9. Kemp, J. P. *et al.* Identification of 153 new loci associated with heel bone mineral  
719 density and functional involvement of GPC6 in osteoporosis. *Nat. Genet.* 49,  
720 1468–1475 (2017).
- 721 10. Morris, J. A. *et al.* An Atlas of Human and Murine Genetic Influences on  
722 Osteoporosis. *bioRxiv* 338863 (2018). doi:10.1101/338863
- 723 11. Boyle, E. A., Li, Y. I. & Pritchard, J. K. An Expanded View of Complex Traits: From  
724 Polygenic to Omnigenic. *Cell* 169, 1177–1186 (2017).
- 725 12. Liu, X., Li, Y. I. & Pritchard, J. K. Trans Effects on Gene Expression Can Drive  
726 Omnigenic Inheritance. *Cell* 177, 1022–1034.e6 (2019).
- 727 13. Komori, T. Regulation of Osteoblast Differentiation by Runx2. *Advances in*  
728 *Experimental Medicine and Biology* 43–49 (2009). doi:10.1007/978-1-4419-1050-  
729 9\_5
- 730 14. Morris, J. A. *et al.* An atlas of genetic influences on osteoporosis in humans and  
731 mice. *Nat. Genet.* 51, 258–266 (2019).
- 732 15. Boyle, E. A., Li, Y. & Pritchard, J. K. The omnigenic model: Response from the  
733 authors. *J. Psychiatry Brain Sci.* 2, S8 (2017).
- 734 16. Wray, N. R., Wijmenga, C., Sullivan, P. F., Yang, J. & Visscher, P. M. Common  
735 Disease Is More Complex Than Implied by the Core Gene Omnigenic Model. *Cell*  
736 173, 1573–1580 (2018).
- 737 17. Cox, N. J. Comments on Pritchard Paper. *Journal of Psychiatry and Brain Science*  
738 2, S5 (2017).
- 739 18. Mäkinen, V.-P. *et al.* Integrative genomics reveals novel molecular pathways and  
740 gene networks for coronary artery disease. *PLoS Genet.* 10, e1004502 (2014).

- 741 19. Civelek, M. & Lusis, A. J. Systems genetics approaches to understand complex  
742 traits. *Nat. Rev. Genet.* 15, 34–48 (2014).
- 743 20. Rau, C. D. *et al.* Systems Genetics Approach Identifies Gene Pathways and  
744 *Adamts2* as Drivers of Isoproterenol-Induced Cardiac Hypertrophy and  
745 Cardiomyopathy in Mice. *Cell Syst* 4, 121–128.e4 (2017).
- 746 21. Kogelman, L. J. A. *et al.* Identification of co-expression gene networks, regulatory  
747 genes and pathways for obesity based on adipose tissue RNA Sequencing in a  
748 porcine model. *BMC Med. Genomics* 7, 57 (2014).
- 749 22. Eising, E. *et al.* Gene co-expression analysis identifies brain regions and cell types  
750 involved in migraine pathophysiology: a GWAS-based study using the Allen  
751 Human Brain Atlas. *Hum. Genet.* 135, 425–439 (2016).
- 752 23. Churchill, G. A. *et al.* The Collaborative Cross, a community resource for the  
753 genetic analysis of complex traits. *Nat. Genet.* 36, 1133–1137 (2004).
- 754 24. van Dam, S., Vösa, U., van der Graaf, A., Franke, L. & de Magalhães, J. P. Gene  
755 co-expression analysis for functional classification and gene–disease predictions.  
756 *Brief. Bioinform.* 19, 575–592 (2018).
- 757 25. Finucane, H. K. *et al.* Partitioning heritability by functional annotation using  
758 genome-wide association summary statistics. *Nat. Genet.* 47, 1228–1235 (2015).
- 759 26. Bolser, D. Mouse Genome Informatics (MGI, Mouse Genome Database, MGD).  
760 *Dictionary of Bioinformatics and Computational Biology* (2004).  
761 doi:10.1002/9780471650126.dob1002
- 762 27. Koscielny, G. *et al.* The International Mouse Phenotyping Consortium Web Portal,  
763 a unified point of access for knockout mice and related phenotyping data. *Nucleic*  
764 *Acids Res.* 42, D802–9 (2014).
- 765 28. Dymont, N. A. *et al.* High-Throughput, Multi-Image Cryohistology of Mineralized  
766 Tissues. *J. Vis. Exp.* (2016). doi:10.3791/54468
- 767 29. Freudenthal, B. *et al.* Rapid phenotyping of knockout mice to identify genetic  
768 determinants of bone strength. *J. Endocrinol.* 231, R31–46 (2016).
- 769 30. Johnson, M. L. How rare bone diseases have informed our knowledge of complex  
770 diseases. *Bonekey Rep* 5, 839 (2016).
- 771 31. Boudin, E. & Van Hul, W. MECHANISMS IN ENDOCRINOLOGY: Genetics of  
772 human bone formation. *Eur. J. Endocrinol.* 177, R69–R83 (2017).
- 773 32. Robinson, M.-E. & Rauch, F. Mendelian bone fragility disorders. *Bone* (2019).  
774 doi:10.1016/j.bone.2019.04.021
- 775 33. Marini, F. & Brandi, M. L. Genetic determinants of osteoporosis: common bases to  
776 cardiovascular diseases? *Int. J. Hypertens.* 2010, (2010).
- 777 34. Rocha-Braz, M. G. M. & Ferraz-de-Souza, B. Genetics of osteoporosis: searching  
778 for candidate genes for bone fragility. *Arch Endocrinol Metab* 60, 391–401 (2016).
- 779 35. Yoshida, C. A. *et al.* SP7 inhibits osteoblast differentiation at a late stage in mice.  
780 *PLoS One* 7, e32364 (2012).
- 781 36. Semënov, M., Tamai, K. & He, X. SOST is a ligand for LRP5/LRP6 and a Wnt  
782 signaling inhibitor. *J. Biol. Chem.* 280, 26770–26775 (2005).
- 783 37. Atkins, G. J. *et al.* Sclerostin is a locally acting regulator of late-  
784 osteoblast/preosteocyte differentiation and regulates mineralization through a  
785 MEPE-ASARM-dependent mechanism. *Journal of Bone and Mineral Research* 26,  
786 1425–1436 (2011).

- 787 38. Nakamura, A. *et al.* Osteocalcin secretion as an early marker of in vitro osteogenic  
788 differentiation of rat mesenchymal stem cells. *Tissue Eng. Part C Methods* 15,  
789 169–180 (2009).
- 790 39. Golub, E. E. & Boesze-Battaglia, K. The role of alkaline phosphatase in  
791 mineralization. *Curr. Opin. Orthop.* 18, 444 (2007).
- 792 40. Roberts, S., Narisawa, S., Harmey, D., Millán, J. L. & Farquharson, C. Functional  
793 involvement of PHOSPHO1 in matrix vesicle-mediated skeletal mineralization. *J.*  
794 *Bone Miner. Res.* 22, 617–627 (2007).
- 795 41. Neve, A., Corrado, A. & Cantatore, F. P. Osteocalcin: Skeletal and extra-skeletal  
796 effects. *Journal of Cellular Physiology* 228, 1149–1153 (2013).
- 797 42. Liu, C. *et al.* FAM20C regulates osteoblast behaviors and intracellular signaling  
798 pathways in a cell-autonomous manner. *Journal of Cellular Physiology* 233, 3476–  
799 3486 (2018).
- 800 43. Cho, Y. & Ryoo, H.-M. MEPE: A Mineralization Regulating Bone Matrix Protein.  
801 *Journal of Korean Endocrine Society* 23, 71 (2008).
- 802 44. Quarles, L. D. & Darryl Quarles, L. FGF23, PHEX, and MEPE regulation of  
803 phosphate homeostasis and skeletal mineralization. *American Journal of*  
804 *Physiology-Endocrinology and Metabolism* 285, E1–E9 (2003).
- 805 45. Chadwick, L. H. The NIH Roadmap Epigenomics Program data resource.  
806 *Epigenomics* 4, 317–324 (2012).
- 807 46. GTEx Consortium *et al.* Genetic effects on gene expression across human tissues.  
808 *Nature* 550, 204–213 (2017).
- 809 47. Kolata, G. Fearing drugs' rare side effects, millions take their chances with  
810 osteoporosis. *NY Times* (2016).
- 811 48. Manolio, T. A. *et al.* Finding the missing heritability of complex diseases. *Nature*  
812 461, 747–753 (2009).
- 813 49. International Schizophrenia Consortium *et al.* Common polygenic variation  
814 contributes to risk of schizophrenia and bipolar disorder. *Nature* 460, 748–752  
815 (2009).
- 816 50. Farber, C. R. Identification of a gene module associated with BMD through the  
817 integration of network analysis and genome-wide association data. *J. Bone Miner.*  
818 *Res.* 25, 2359–2367 (2010).
- 819 51. Calabrese, G. M. *et al.* Integrating GWAS and Co-expression Network Data  
820 Identifies Bone Mineral Density Genes SPTBN1 and MARK3 and an Osteoblast  
821 Functional Module. *Cell Syst* 4, 46–59.e4 (2017).
- 822 52. Wakayama, T. & Iseki, S. Role of the spermatogenic–Sertoli cell interaction  
823 through cell adhesion molecule-1 (CADM1) in spermatogenesis. *Anat. Sci. Int.* 84,  
824 112–121 (2009).
- 825 53. Zhang, W. *et al.* CADM1 regulates the G1/S transition and represses  
826 tumorigenicity through the Rb-E2F pathway in hepatocellular carcinoma.  
827 *Hepatobiliary Pancreat. Dis. Int* 15, 289–296 (2016).
- 828 54. Cao, W., Shi, P. & Ge, J.-J. miR-21 enhances cardiac fibrotic remodeling and  
829 fibroblast proliferation via CADM1/STAT3 pathway. *BMC Cardiovasc. Disord.* 17,  
830 88 (2017).
- 831 55. Nakamura, S. *et al.* Negative feedback loop of bone resorption by NFATc1-  
832 dependent induction of Cadm1. *PLoS One* 12, e0175632 (2017).



- 833 56. Inoue, T. *et al.* Cell adhesion molecule 1 is a new osteoblastic cell adhesion  
834 molecule and a diagnostic marker for osteosarcoma. *Life Sci.* 92, 91–99 (2013).
- 835 57. Mentink, A. *et al.* Predicting the therapeutic efficacy of MSC in bone tissue  
836 engineering using the molecular marker CADM1. *Biomaterials* 34, 4592–4601  
837 (2013).
- 838 58. Meller, N., Irani-Tehrani, M., Kiosses, W. B., Del Pozo, M. A. & Schwartz, M. A.  
839 Zizimin1, a novel Cdc42 activator, reveals a new GEF domain for Rho proteins.  
840 *Nat. Cell Biol.* 4, 639–647 (2002).
- 841 59. Bioinformatics, B. FastQC: a quality control tool for high throughput sequence  
842 data. *Cambridge, UK: Babraham Institute* (2011).
- 843 60. Raghupathy, N. *et al.* Hierarchical analysis of RNA-seq reads improves the  
844 accuracy of allele-specific expression. *Bioinformatics* 34, 2177–2184 (2018).
- 845 61. Love, M. I., Huber, W. & Anders, S. Moderated estimation of fold change and  
846 dispersion for RNA-seq data with DESeq2. *Genome Biol.* 15, 550 (2014).
- 847 62. Stegle, O., Parts, L., Piipari, M., Winn, J. & Durbin, R. Using probabilistic  
848 estimation of expression residuals (PEER) to obtain increased power and  
849 interpretability of gene expression analyses. *Nat. Protoc.* 7, 500–507 (2012).
- 850 63. Langfelder, P. & Horvath, S. WGCNA: an R package for weighted correlation  
851 network analysis. *BMC Bioinformatics* 9, 559 (2008).
- 852 64. Chen, J., Bardes, E. E., Aronow, B. J. & Jegga, A. G. ToppGene Suite for gene list  
853 enrichment analysis and candidate gene prioritization. *Nucleic Acids Res.* 37,  
854 W305–11 (2009).
- 855 65. Machiela, M. J. & Chanock, S. J. LDlink: a web-based application for exploring  
856 population-specific haplotype structure and linking correlated alleles of possible  
857 functional variants. *Bioinformatics* 31, 3555–3557 (2015).
- 858 66. Lawrence, M. *et al.* Software for computing and annotating genomic ranges. *PLoS*  
859 *Comput. Biol.* 9, e1003118 (2013).
- 860 67. Hubbard, T. *et al.* The Ensembl genome database project. *Nucleic Acids Res.* 30,  
861 38–41 (2002).
- 862 68. Giambartolomei, C. *et al.* Bayesian test for colocalisation between pairs of genetic  
863 association studies using summary statistics. *PLoS Genet.* 10, e1004383 (2014).
- 864 69. Sabik, O. L. & Farber, C. R. RACER: A data visualization strategy for exploring  
865 multiple genetic associations. *bioRxiv* 495366 (2018). doi:10.1101/495366
- 866 70. Kurbatova, N., Mason, J. C., Morgan, H., Meehan, T. F. & Karp, N. A. PhenStat: A  
867 Tool Kit for Standardized Analysis of High Throughput Phenotypic Data. *PLoS One*  
868 10, e0131274 (2015).

869
